# Supplementary material
Source: PubMed Central journal article supplement (PMC8884026)
Supplement: NIHMS1781401-supplement-Supplement_with_figures_and_tables.pdf [file NIHMS1781401-supplement-Supplement_with_figures_and_tables.pdf]

## Supplementary Material

# Hyperglycaemia in CF adversely affects BK channel function critical for mucus clearance

Charles D. Bengtson<sup>1,\*</sup>, Michael D. Kim<sup>1,\*</sup>, Abeer Anabtawi<sup>2</sup>, Jianghua He<sup>3</sup>, John S. Dennis<sup>1</sup>, Sara Miller<sup>1</sup>, Makoto Yoshida<sup>1</sup>, Nathalie Baumlin<sup>1</sup>, Matthias Salathe<sup>1</sup>

**Affiliations:** <sup>1</sup>Department of Internal Medicine, Division of Pulmonary, Critical Care and Sleep Medicine, <sup>2</sup>Department of Internal Medicine, Division of Endocrinology, Metabolism, and Genetics, and <sup>3</sup>Department of Biostatistics & Data Science, University of Kansas Medical Center, Kansas City, KS 66160, USA.

\*Contributed equally

**Correspondence:** Matthias Salathe, Department of Internal Medicine, University of Kansas Medical Center, 3901 Rainbow Blvd., 4032 Delp, MS 1022, Kansas City, KS 66160, USA. Email: msalathe@kumc.edu.

## Supplementary methods

### Cell culture

Culturing of human bronchial epithelial cells (HBECs) at the air-liquid interface (ALI) was performed as described [1]. For non-CF lungs, HBECs were thawed at 37°C, resuspended in warm bronchial epithelial cell growth medium (BEGM), and spun at 360 x g for 5 min at room temperature. The supernatant was discarded, and the cell pellet resuspended in BEGM with Amphotericin B (10 µg/mL). The density of viable cells plated in a 10 cm dish was approximately 1-2 x 10<sup>6</sup>. Once the cells reached confluence, they were trypsinized and plated on Transwell and/or Snapwell inserts at a minimum of 150,000 cells/cm<sup>2</sup> in ALI media. Preparation of ALI media is adapted from published methods [1] and made with 50:50 Dulbecco's Modified Eagle Medium (DMEM):LHC Medium supplemented with 0.87 µM insulin (#660001; FeF Chemicals, Denmark), 0.1986 µM hydrocortisone (#H0396; MilliporeSigma, Burlington, MA, USA), 0.01 µM triiodothyronine (#T6397; MilliporeSigma), 0.125 µM transferrin (#2914-HT; R&D Systems, Minneapolis, MN, USA), 0.5 µM phosphorylethanolamine (#P0505; MilliporeSigma), 0.5 µM ethanolamine (#E0135; MilliporeSigma), 10 µg/mL bovine pituitary extract (Animal Technologies, Tyler, TX, USA), 0.5 mg/mL bovine serum albumin (#A7638; MilliporeSigma), trace elements [1], stock 4 [1], stock 11 [1], 2.73 µM epinephrine (#E4642; MilliporeSigma), 0.05 µM retinoic acid (#R2625; MilliporeSigma), 0.5 ng/mL epidermal growth factor (#354001; BD Biosciences, San Jose, CA, USA), and 100U-100µg/mL penicillin/streptomycin (#15140-122; ThermoFisher Scientific, Waltham, MA, USA). Low (5.5 mM) glucose DMEM (#11885) and high (25 mM) glucose DMEM (#11995) were acquired from ThermoFisher Scientific. A 50:50 solution of low glucose DMEM and LHC medium (5.5 mM glucose) was used to make 5.5 mM glucose ALI media. A 50:50 solution of high glucose DMEM and LHC medium was used to make high

glucose ALI media that we measured at 12.5 mM glucose. For CF lungs, HBECs were expanded in PneumaCult™-Ex Plus Medium (STEMCELL Technologies, Cambridge, MA, USA) before trypsinizing and plating on Transwell inserts. HBECs were maintained submerged for 4-6 days before exposing them to air and allowing them to re-differentiate for a minimum of three weeks before experiments were performed. ALI media was replaced every Monday, Wednesday, and Friday once HBECs were exposed to air.

### **Ussing chamber**

Cystic fibrosis transmembrane conductance regulator (CFTR) and large conductance,  $\text{Ca}^{2+}$ -activated and voltage-dependent  $\text{K}^+$  channel (BK) activities were recorded in Ussing chambers as previously described [2, 3]. Briefly, ENaC currents were blocked by 10  $\mu\text{M}$  amiloride (MilliporeSigma) before CFTR currents were stimulated by 10  $\mu\text{M}$  forskolin (MilliporeSigma) and inhibited by 10  $\mu\text{M}$  CFTR<sub>inh</sub>-172 (MilliporeSigma). Prior to measuring BK currents, the basolateral membranes were permeabilized with 20  $\mu\text{M}$  amphotericin B (MilliporeSigma), 10  $\mu\text{M}$  Nigericin (Tocris Bioscience, Minneapolis, MN, USA), and 10  $\mu\text{M}$  Valinomycin (Tocris Bioscience). The cells were exposed to a  $\text{K}^+$  gradient of 140 mM at the permeabilized basolateral side and 5 mM at the apical side. After ENaC currents were blocked by 10  $\mu\text{M}$  amiloride, BK currents were stimulated by 10  $\mu\text{M}$  ATP (Tocris Bioscience). The transepithelial membrane potential was clamped at 0 mV (model VCC MC8; Physiologic Instruments, San Diego, CA, USA), using Ag/AgCl electrodes in agar bridges. Signals were digitized and recorded using the Acquire and Analyze revision II module according to the manufacturer's instructions. The experiments were performed at 37°C using heated water jackets and bubbled with a gas mixture of 95%  $\text{O}_2$  / 5%  $\text{CO}_2$  to maintain physiological pH in the apical and basolateral buffers for CFTR

currents. Apical and basolateral buffers for measuring BK currents are adjusted to pH 7.4 and buffers are circulated in the Ussing chambers with air [4]. Ussing chamber experiments were performed 24 h after apical wash and basolateral media change unless otherwise noted. CFTR and BK measurements in NHBE cells on Snapwell inserts were conducted using 1.12 cm<sup>2</sup> aperture sliders (#P2302; Physiologic Instruments). BK measurements in CFBE cells on Transwell inserts were conducted using 0.10 cm<sup>2</sup> aperture sliders (#P2303; Physiologic Instruments), which may account for the larger BK currents observed in these cells. For mallotoxin experiments, 5 μM mallotoxin (#R5648; MilliporeSigma) was added 10 min after amiloride. For paxilline and TRAM-34 experiments, 10 μM paxilline (#P2928; MilliporeSigma), 1 μM TRAM-34 (#T6700; MilliporeSigma), or DMSO (control) was added 5 min after amiloride and 10 min before ATP stimulation.

### **Nasal cells collection**

Nasal cells were collected using sterile cytology brushes (Medical Packaging Corporation, Camarillo, CA, USA). The brushes were introduced into the nasal cavity under direct visual guidance and were placed between the nasal septum and the inferior turbinate. No anesthesia was used. The cells were harvested by a few careful backward-forward and rotary movements before twirling the brush into 5 mL of sterile PBS in a 15 mL tube to release the cells. The same procedure was repeated 3 times in each nostril. Immediately after the harvest, the tube was centrifuged at 360 x g for 5 min at 4°C. The supernatant was discarded, and the remaining pellet was frozen at -80°C until qPCR experiments were performed.

## **Subject criteria**

### Inclusion criteria:

- i. Patients with cystic fibrosis older than age 18 years.
- ii. Subjects selected for CFRD group will have a positive OGTT

### Exclusion criteria:

- i. Nasal glucocorticoid use the day of Visit 1 or systemic glucocorticoid use within the past 7 days
- ii. Angiotensin receptor blocker (ARB) use within the past 7 days

### Withdrawal/Termination criteria:

A subject withdrawal is defined as a discontinuation from the study for any reason. Subjects may withdraw or be withdrawn from this study for the following reasons:

- As by their own request or at the request of their authorized representative at any time for any reason
- If continuation in the study would be detrimental to the subject's well-being, in the investigator's opinion

**Table S1. Non-CF lung donor information.**

| <b>Sex</b> | <b>Age</b> |
|------------|------------|
| Female     | 15         |
| Female     | 19         |
| Female     | 38         |
| Female     | 49         |
| Female     | 49         |
| Female     | 51         |
| Female     | 57         |
| Male       | 19         |
| Male       | 21         |
| Male       | 21         |
| Male       | 22         |
| Male       | 38         |
| Male       | 38         |
| Male       | 46         |
| Male       | 52         |
| Male       | 55         |
| Male       | 56         |
| Male       | 65         |
| Male       | 67         |

**Table S2. CF lung donor information.**

| <b>Sex</b> | <b>Age</b> | <b>CFTR Mutation</b> |
|------------|------------|----------------------|
| Female     | 17         | F508del/R1162X       |
| Female     | 21         | R1162X/unknown       |
| Female     | 27         | F508del/G542X        |
| Female     | 36         | F508del/F508del      |
| Male       | 27         | F508del/F508del      |
| Male       | 29         | F508del/W1145X       |
| Male       | 45         | F508del/F508del      |
| Male       | 54         | F508del/F508del      |

**Table S3. Baseline participant characteristics.**

|                                          | CF (n=5)    | CFRD (n = 12) | Difference (95% CI)  |
|------------------------------------------|-------------|---------------|----------------------|
| Age (mean ± SEM)                         | 22 ± 0.7    | 32 ± 0.5      | 10 (5.3, 14.7)       |
| Female sex (%)                           | 3 (0.6)     | 4 (0.3)       | 0.3 (-0.2, 0.8)      |
| BMI                                      | 21.8 ± 0.48 | 23.6 ± 0.35   | 1.83 (0.49, 3.16)    |
| F508del / F508del (%)                    | 2 (0.4)     | 6 (0.5)       | -0.1 (-0.41, 0.61)   |
| F508del / minimum function (%)           | 3 (0.6)     | 4 (0.3)       | 0.3 (-0.2, 0.8)      |
| CFTR modulator use (%)*                  | 3 (0.6)     | 7 (0.58)      | 0.02 (-0.49, 0.53)   |
| Hemoglobin A1C (mean ± SEM)              | 5.4 ± 0.09  | 6.8 ± 0.12    | -1.4 (0.47, 2.33)    |
| Baseline % predicted FEV1 (mean ± SEM)** | 98% ± 2.1   | 64% ± 1.7     | -34 (-50.77, -17.23) |

Differences are expressed as difference in mean or proportion between CF and CFRD with 95% confidence intervals.

\* Includes ivacaftor, lumacaftor/ivacaftor, tezacaftor/ivacaftor and elexacaftor/tezacaftor/ivacaftor.

\*\* Based upon highest % predicted FEV1 in the 12 months preceding study enrollment.

**Table S4. Comparison of CGM variables between groups**

|                                        | CF (n = 5)          | CFRD (n = 12)          | Difference (95% CI)      |
|----------------------------------------|---------------------|------------------------|--------------------------|
| Length of CGM recording (mean ± SEM)*  | 5 ± 2.3             | 7.3 ± 2.4              | -2.3 (-4.99, 0.39)       |
| Glucose management indicator           | 6.1 (5.9, 6.7)      | 7.3 (6.6, 7.9)         | 1.2 (0.2 to 2)           |
| Mean amplitude of glycemic excursions  | 63.1 (36, 92)       | 115.2 (69, 129)        | 52.1 (-1.1 to 80.2)      |
| % time glucose >140mg/dL               | 16.4 (9.3, 37.5)    | 60.5 (34.4, 79.8)      | 44.1 (11.7 to 62.1)      |
| % time glucose >200mg/dL               | 2.1 (0.4, 12.6)     | 25.3 (6.8, 42.1)       | 23.2 (2.0 to 41.5)       |
| Average AUC glucose > 180mg/dL         | 12848 (1590, 58853) | 166523 (46199, 323090) | 153675 (16235 to 333345) |
| Number of glucose excursions >200mg/dL | 18 (6, 25)          | 27.5 (19.8, 31.3)      | 9.5 (-1 to 23)           |

Values reported as median (25<sup>th</sup> percentile, 75<sup>th</sup> percentile), differences between medians with 95% confidence intervals

## Supplementary Figure S1.

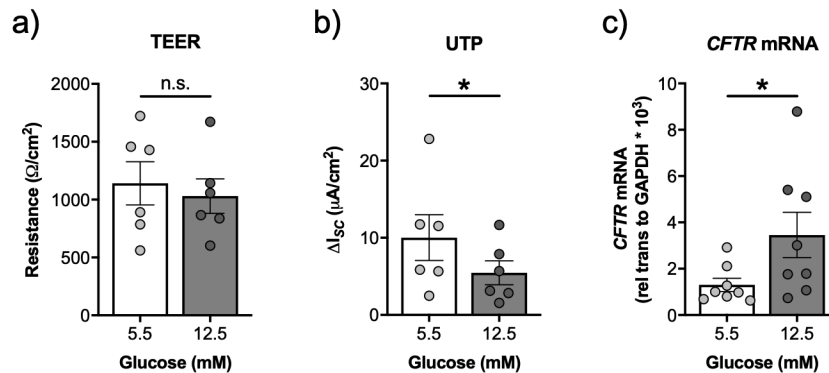

**FIGURE S1. Effects of high glucose on transepithelial electrical resistance (TEER), calcium-activated chloride channel (CaCC) conductance, and *CFTR* mRNA expression in NHBE cells *in vitro*.** **a)** TEER, as measured in Ussing chambers, is not significantly different between NHBE cells cultured in ALI media with starting glucose concentrations of 5.5 mM or 12.5 mM (n=6 lungs). **b)** CaCC current, as measured by UTP-stimulated  $I_{SC}$  in Ussing chambers, is significantly decreased in NHBE cells cultured in 12.5 mM glucose compared to NHBE cells cultured in 5.5 mM glucose (n=6 lungs). **c)** Expression of *CFTR* mRNA is significantly increased in NHBE cells cultured in 12.5 mM glucose compared to NHBE cells cultured in 5.5 mM glucose (n=8 from 6 lungs). \*  $p < 0.05$ , Student's t-test. n.s.=not significant. Data are shown as mean  $\pm$  S.E.M.



## Supplementary Figure S2.

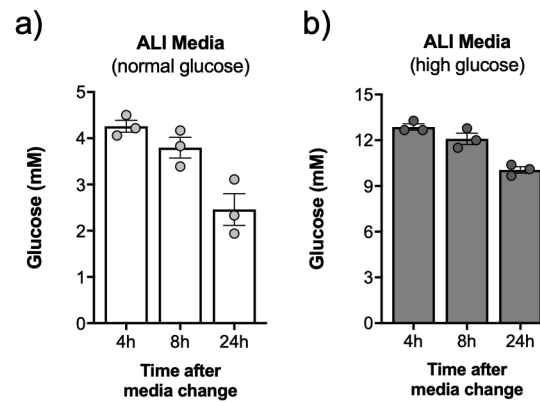

**FIGURE S2. Time-course measurement of glucose concentrations in the basolateral media.**

a) Measurement of glucose levels in the basolateral media over time of CFBE cells cultured in ALI media with a starting glucose concentration of 5.5 mM (n=3 CF lungs). b) Measurement of glucose levels in the basolateral media over time of CFBE cells cultured in ALI media with a starting glucose concentration of 12.5 mM (n=3 CF lungs). Data are shown as mean  $\pm$  S.E.M.

### Supplementary Figure S3.

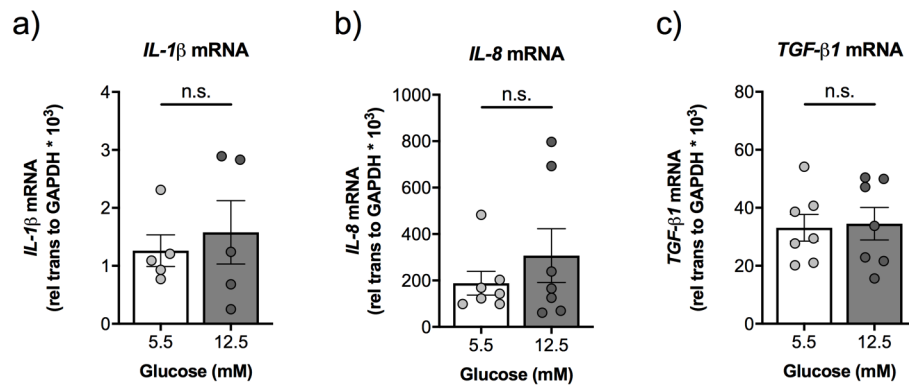

**FIGURE S2. mRNA expression levels of *IL-1β*, *IL-8*, and *TGF-β1* do not change in response to elevated glucose in CFBE cells *in vitro*.** a-c) mRNA expression levels of *IL-1β* (a), *TGF-β1* (b), and *IL-8* (c) are not significantly different between CFBE cells cultured in ALI media with starting glucose concentrations of 5 mM or 12.5 mM. n.s.=not significant, Wilcoxon or Student's t-test. Data are shown as mean ± S.E.M.

## Supplementary Figure S4.

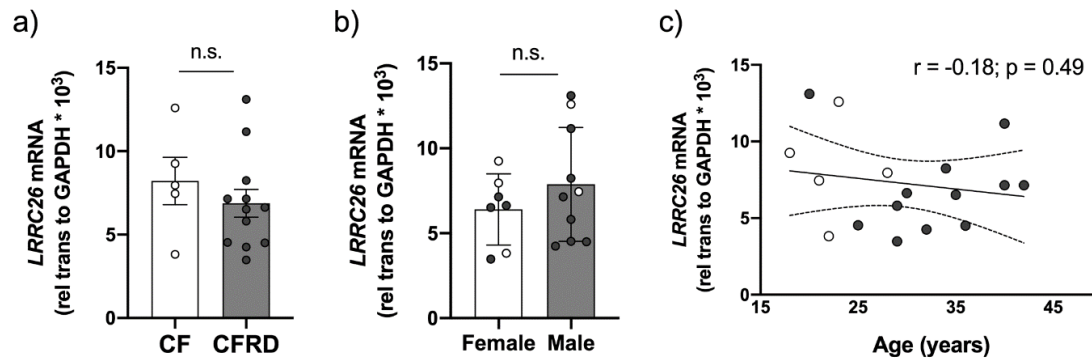

**Figure S4. Comparison of clinically relevant covariates lack correlation with *LRRC26* expression *in vivo*.** There was no statistically significant difference between *LRRC26* expression and (a) CF (open circles) and CFRD (shaded circles), (b) sex and (c) participant age ( $p > 0.05$  for all). n.s.=not significant.

## References

1. Randell SH, Fulcher ML, O'Neal W, Olsen JC. Primary epithelial cell models for cystic fibrosis research. *Methods Mol Biol* 2011; 742: 285-310.
2. Schmid A, Baumlin N, Ivonnet P, Dennis JS, Campos M, Krick S, Salathe M. Roflumilast partially reverses smoke-induced mucociliary dysfunction. *Respir Res* 2015; 16: 135.
3. Manzanares D, Krick S, Baumlin N, Dennis JS, Tyrrell J, Tarran R, Salathe M. Airway Surface Dehydration by Transforming Growth Factor beta (TGF-beta) in Cystic Fibrosis Is Due to Decreased Function of a Voltage-dependent Potassium Channel and Can Be Rescued by the Drug Pirfenidone. *J Biol Chem* 2015; 290(42): 25710-25716.
4. Manzanares D, Gonzalez C, Ivonnet P, Chen RS, Valencia-Gattas M, Conner GE, Larsson HP, Salathe M. Functional apical large conductance, Ca<sup>2+</sup>-activated, and voltage-dependent K<sup>+</sup> channels are required for maintenance of airway surface liquid volume. *J Biol Chem* 2011; 286(22): 19830-19839.
5. Manzanares D, Srinivasan M, Salathe ST, Ivonnet P, Baumlin N, Dennis JS, Conner GE, Salathe M. IFN-gamma-mediated reduction of large-conductance, Ca<sup>2+</sup>-activated, voltage-dependent K<sup>+</sup> (BK) channel activity in airway epithelial cells leads to mucociliary dysfunction. *Am J Physiol Lung Cell Mol Physiol* 2014; 306(5): L453-462.
